1 A scoping review of the research  
2 integrity architecture and how it is  
3 addressed in legal frameworks,  
4 institutional policies, and the scholarly  
5 literature: Research protocol  
6  
7

8 **Authors**

9 Juan Guillermo Pérez<sup>1\*</sup>, Carolina Torres-Sarmiento<sup>1</sup>, Andrés Felipe Duarte Castro<sup>2</sup>, Luis Eduardo  
10 Gómez<sup>1</sup>, Vivienne C. Bachelet<sup>3</sup>

11

12 **Affiliations**

13 <sup>1</sup>Dirección de Investigación e Innovación, Universidad del Rosario, Bogotá, Colombia

14 <sup>2</sup>Decanatura Facultad de Humanidades y Ciencias Sociales, Pontificia Universidad Javeriana Cali, Cali,  
15 Colombia

16 <sup>3</sup>Escuela de Medicina, Facultad de Ciencias Médicas, Universidad de Santiago de Chile, Santiago,  
17 Chile

18

19 \*Correspondence author: Juan Guillermo Pérez

20 [juangu.perez@urosario.edu.co](mailto:juangu.perez@urosario.edu.co)

21

## 22 Abstract

23 **Background:** Research integrity is a dynamic area within the ethical research ecosystem. Several  
24 efforts have been made to incorporate this topic in scientific governance frameworks. However, the  
25 efforts generally result in non-binding declarations and policies. Due to differences in legal systems,  
26 research cultures, and institutional approaches worldwide, there is a need to identify and map  
27 existent strategies on sound scientific practices.

28 **Objective:** This scoping review aims to systematically search, map, and evaluate the best available  
29 evidence on strategies and recommendations regarding research integrity. The goal is to identify  
30 international, national, regional, and local legal frameworks, institutional policies and guidelines,  
31 research integrity policies, interventions, strategies, and recommendations for:

- 32 (i) The design and conduct of research projects,
- 33 (ii) The publication of research results,
- 34 (iii) The monitoring of scientific practices,
- 35 (iv) The implementation of corrective actions, and
- 36 (v) Mentoring and education on research integrity.

37 **Methods:** The search will follow the PRISMA Extension for Scoping Reviews (PRISMA-ScR) and the  
38 methodological approach designed by Arksey and O'Malley. It will include legal frameworks, national  
39 and international governmental and non-governmental documentation, and scholarly articles  
40 published in peer-reviewed journals on research integrity. The search will be conducted in  
41 PubMed/MEDLINE, Web of Science, JSTOR, Latin American & Caribbean Health Sciences Literature  
42 (Lilacs), Scopus, OECD Library. It will be complemented with hand searching and scanning, covering  
43 other databases and grey literature sources. We will extract and synthesize the data using two  
44 macro-genres: legal documents (soft law and hard law) and non-legal documents.

45 **Keywords:** Research integrity, publication ethics, scoping review, Latin America

46

47

48

49

50

51

52

53

## 54 1 RATIONALE

---

55 Research integrity is a dynamic area recognized as vitally important by multiple stakeholders,  
56 including governments, funding institutions and the global scientific community<sup>1,2</sup>. Recently, the  
57 topic has been increasingly under the spotlight because of the necessity of creating appropriate  
58 scientific governance and other efforts to formalize and institutionalize good science<sup>3</sup>. According to  
59 Armond et al., academic interest in research integrity surged in the last decade for reasons such as  
60 the evolving nature of research environments due to the introduction of new technologies, the  
61 pressure to publish, competition for funding, diversification in collaboration, and the rise in  
62 publicized cases of misconduct<sup>4</sup>.

63 Due to its heterogeneity, there is no international consensus about the definition of research  
64 integrity<sup>1</sup>. Different terminologies have been used, such as ‘scientific integrity’, ‘responsible  
65 conduct of research’, and ‘research integrity’<sup>5</sup>, potentially resulting in ambiguity. Ultimately, it is  
66 often up to researchers, institutions, and other external and internal players to come up with  
67 definitions<sup>6</sup>. For investigators, research integrity is related to principles such as honesty,  
68 accountability, professional courtesy and fairness, and good stewardship<sup>7</sup>. For institutions, research  
69 integrity may be associated with creating and sustaining environments that promote responsible  
70 behaviors and high ethical standards, education, and policies<sup>7</sup>.

71 Several efforts have been made internationally to create a roadmap that links research integrity with  
72 principles, responsible behaviors, and good practices. For instance, the Singapore Statement on  
73 Research Integrity incorporated some principles and professional responsibilities, recognizing the  
74 existing and potential national and disciplinary dissimilarities in designing and conducting research<sup>7</sup>.

75 Also, the Montreal Statement on Research Integrity in Cross-Boundary Research Collaborations  
76 highlighted that cross-national, institutional, disciplinary and sectoral research collaborations are  
77 crucial to advancing knowledge<sup>8</sup>. Specifically, it recognized that these collaborations are particularly  
78 challenging for the responsible conduct of research as they potentially encompass significant  
79 differences “in regulatory and legal systems, organizational and funding structures, research  
80 cultures, and approaches to training”<sup>8</sup>.

81 The Hong Kong Principles for Assessing Researchers explicitly focused on strengthening research  
82 integrity by rewarding behaviors related to responsible research practices, thus, avoiding  
83 “detrimental research practices”<sup>9</sup>. Moreover, the Hong Kong principles were designed to help  
84 institutions “minimize perverse incentives that invite to engage in questionable research practices”  
85 <sup>9</sup>.

86 Furthermore, the Universal Declaration on Bioethics and Human Rights embodies an important step  
87 in research integrity by acknowledging that unethical scientific and technological conduct has a  
88 distinct impact on peoples and local communities. This declaration focuses on the special needs of  
89 developing countries and promotes equitable access to science and technology and the rapid sharing  
90 of knowledge<sup>10</sup>.

91 In Latin America, countries such as Argentina, Brazil, Chile, Colombia, Costa Rica, Mexico, Nicaragua,  
92 Peru, and Venezuela adopted laws, policies and guidelines on research integrity<sup>11</sup>. However, these  
93 frameworks contain limitations such as the lack of agreed definitions, problems with reporting  
94 scientific misconduct, deficiencies in the design and implementation of legal standards, absence of  
95 regulatory agencies and infrastructure, lack of funding, confusion about roles and responsibilities,  
96 miscommunication, and uncertainty<sup>11</sup>. These constraints make research integrity more challenging  
97 to investigate or to understand as a social problem. While research integrity is more institutionalized

98 in the global north, such as North America and Europe, in Latin America, inter-institutional and  
99 intersectoral discussions are lacking <sup>12</sup>

100 In Colombia, the Ministry of Science, Technology, and Innovation (MinCiencias)—previously named  
101 the Administrative Department of Science, Technology, and Innovation (Colciencias)—enacted the  
102 National Resolution 0314 of 2018 that implemented the Ethics, Bioethics and Research Integrity  
103 Policy <sup>13</sup>. In general terms, the document incorporates minimum guidelines on ethics and good  
104 scientific practices for all actors of the National System of Science, Technology, and Innovation  
105 (NSSTaI). The document addresses research integrity as the central component to maintain trust and  
106 credibility in science through sound knowledge generation and adoption practices by the national  
107 research community. The policy encourages the consolidation of a governance system that  
108 encompasses research integrity principles, research ethics, and bioethics at the national level <sup>13</sup>.

109 This national policy acknowledges (i) the need for the implementation of internal regulations, as  
110 these actions are typically managed autonomously; (ii) the lack of consolidated national data on the  
111 different practices (or breaches) concerning, for instance, author intellectual property (Law 23 of  
112 1982); (iii) the absence of legal or disciplinary actions in cases of misconduct which reinforces its  
113 invisibility; and (iv) the non-existence of a shared culture on research practices and levels of  
114 responsibility, either institutional or personal <sup>14</sup>.

115 In sum, research integrity is part of the ethical research ecosystem based on public trust. Scientific  
116 misconduct curtails the advancement of knowledge and the social backing of science. Consequently,  
117 there is a need for identifying and mapping existing strategies on good scientific practices and the  
118 best available evidence in the literature for effective implementation of research integrity programs.  
119 Even though there are multiple international efforts to consolidate global frameworks on research  
120 integrity, the topic has not been studied extensively in Latin America <sup>12</sup>.

## 121 2 OBJECTIVES

---

122 The purpose of this review is to systematically search, map, and evaluate the best available evidence  
123 on strategies and recommendations regarding research integrity and good scientific practices. We  
124 aim to identify international, national, regional, and local legal frameworks, institutional policies and  
125 guidelines, research integrity policies, interventions, strategies, and recommendations for:

- 126 (i) The design and conduct of research projects,
- 127 (ii) The publication of research results,
- 128 (iii) The monitoring of scientific practices in research-based environments,
- 129 (iv) The implementation of corrective actions when necessary, and
- 130 (v) Mentoring and education on research integrity.

131

## 132 3 METHODS

---

### 133 3.1 PROTOCOL AND REGISTRATION

134 To address the purpose of this review, we will use the scoping review methodology following the  
135 PRISMA Extension for Scoping Reviews (PRISMA-ScR). We will also refer to the seminal paper by  
136 Arksey and O'Malley on a methodological framework for scoping reviews<sup>15</sup>. This protocol will be  
137 published in a preprint server before beginning the data extraction and evidence synthesis. Quality  
138 appraisal or risk of bias assessment will not be done as this review aims to map all documents  
139 deemed pertinent to the research field.

### 140 3.2 ELIGIBILITY CRITERIA

141 Our inclusion criteria will be comprehensive to increase the sensitivity of our search strategies. Thus,  
142 we will include:

- 143 - International, national, regional, and local legal frameworks involving research integrity,  
144 including international declarations, statements, rules, regulations, guidelines, policies,  
145 country experiences, case reports and white papers;
- 146 - National and international governmental and non-governmental documentation on research  
147 integrity;
- 148 - Scholarly articles published in peer-reviewed journals with no limitation on study design.

149 We will not restrict for geographical location. We will include multi and interdisciplinary studies  
150 using quantitative, qualitative, mixed methods, and policy papers. We will not exclude any specific  
151 areas of scientific knowledge. No limits on publication dates will be applied. We will include  
152 references in Spanish and English.

153 We will exclude any document type or scholarly article not directly addressing research integrity.  
154 Likewise, we will not include press releases, opinion pieces, news items, blogs, congress abstracts  
155 (unless a full-text version is available), videos, slides, interviews, legal cases, letters to the editor,  
156 corrigendum and errata, duplicate publications, scientific integrity reviews, and any other non-  
157 scholarly literature.

158 We will work with two macro-genres: legal documents (soft law and hard law) and non-legal  
159 documents.

160 On the one hand, soft law refers to non-legally binding principles, statements, and declarations; on  
161 the other hand, hard law refers to documents that are legally binding and enforceable in courts to  
162 the parties involved in the agreements (such as citizens, companies, and governmental institutions in  
163 a national jurisdiction or countries in an international or multilateral jurisdiction)<sup>16</sup>. Accordingly, we  
164 will consider international, regional, national, and local legal frameworks and international treaties  
165 and statements. Except for the OECD iLibrary, the information sources used to find these legal  
166 documents will be hand searched. We will consider the scholarly literature, grey literature and  
167 discussion and guideline papers issued by scientific associations and non-governmental entities.

### 168 3.3 INFORMATION SOURCES

169 To achieve a comprehensive understanding of the state-of-the-art in research integrity in the three  
170 different contexts that we are interested in (international, regional, and national/local), we will use  
171 the following data sources:

- 172 • *PubMed/MEDLINE*: developed by the National Library of Medicine, has more than 22 million  
173 references of the biomedical literature, including journals and e-books.

- 174 • *Web of Science*: a multidisciplinary database with bibliographic information of around  
175 12.000 international journals, including other open access sources.
- 176 • *JSTOR*: a digital library encompassing books and other primary sources, journals in  
177 humanities and social sciences. It provides full-text searches of approximately 2,000  
178 international journals.
- 179 • *Latin American & Caribbean Health Sciences Literature (Lilacs)*: a database maintained and  
180 updated by educational, research and, health institutions from the government and private  
181 sector.
- 182 • *Scopus* is Elsevier’s abstract and citations database: containing more than 16.500 peer-  
183 reviewed journals in different fields, including life sciences, social sciences, physical sciences,  
184 and health sciences.
- 185 • *OECD Library*: the official online library of the Organization for Economic Cooperation and  
186 Development and contains books, papers, and statistical resources.
- 187 • *Other information sources*:
- 188 ○ Global governmental and non-governmental sources and databases (e.g., Australian  
189 Government- Australian Research Council. Available at:  
190 <https://www.arc.gov.au/policies-strategies/research-integrity>; The UK Research  
191 Integrity Office. Available at: <https://ukrio.org>; The US Department of Health and  
192 Human Services- Office of Research Integrity. Available at: <https://ori.hhs.gov>).
  - 193 ○ *Open Grey*: a European grey literature information system that contains topics in  
194 science, technology, biomedical sciences, among others. Available at:  
195 <http://www.opengrey.eu/>
  - 196 ○ Multilateral organization’s sources and databases (e.g., The World Bank, The World  
197 Health Organization, United Nations Educational, Scientific and Cultural Organization  
198 (UNESCO)).
  - 199 ○ *Community Research and Development Information Service (CORDIS)*: the European  
200 Commission's main source of results from funded research and innovation projects  
201 (FP1 to Horizon 2020). Available at: <https://cordis.europa.eu/en> *The National*  
202 *Academies of Sciences, Engineering, and Medicine*.
  - 203 ○ *The National Academies Press* publishes reports from the National Academies of  
204 Sciences, Engineering, and Medicine: It issues more than 200 books a year and  
205 provides information on science and health policy matters. Available at:  
206 <https://www.nap.edu/catalog/21896/fostering-integrity-in-research>
  - 207 ○ *Committee on Publication Ethics (COPE) website*: *COPE provides leadership in*  
208 *thinking on publication ethics and practical resources to educate and support*  
209 *members, and offers a professional voice in current debates.*

### 210 3.4 SEARCH STRATEGY

211 Table 1 shows the terms that will be used to build the search strategies for each data source.

212 Table 1: Terms used for search strategies by language.

| Terms in English                  | Terms in Spanish                                  |
|-----------------------------------|---------------------------------------------------|
| Research integrity                | Integridad en la investigación                    |
| Publication ethics                | Ética en las publicaciones                        |
| Scientific misconduct             | Mala práctica, mala conducta científica           |
| Scientific integrity              | Integridad científica                             |
| Responsible research practices    | Prácticas responsables en investigación           |
| Good research practices           | Buenas prácticas en investigación                 |
| Responsible behaviors in research | Conducta responsable en investigación             |
| Research integrity training       | Formación sobre la integridad en la investigación |
| Supervision and mentoring         | Supervisión y tutoría                             |

|                           |                                  |
|---------------------------|----------------------------------|
| Training                  | Formación                        |
| Research collaboration    | Colaboración en la investigación |
| Data management practices | Gestión de datos                 |
| Strategies                | Estrategias                      |
| Policies                  | Políticas                        |

213

214 We built the search strategies using a combination of the terms included in Table 1 with the Boolean  
215 operators "and" and "or." These operators were commonly used to represent binary logic values  
216 between the representation of keywords.

217 To be consistent with the research question, we connected the terms to the following categories to  
218 structure the search strategies: (i) topic, (ii) population, (iii) intervention, and (iv) type of document.  
219 In addition, we used the best combination of terms for each database given the differences between  
220 search engines, so the search details will have slight variations to achieve breadth and scope.

221 PubMed/MEDLINE was used for the initial search strategy test. Because of its wide variety of  
222 options, we were able to build a more complex search strategy for this database. In contrast, JSTOR  
223 sets a limit of seven terms and 200 characters for search details, entailing fewer query terms than  
224 other search engines. In other cases, such as the OECD iLibrary, CORDIS, and Lilacs, the results of the  
225 research queries with few terms were enough for this scoping review.

226 Below, we present the resulting search strategies by information source and the results accrued on  
227 the day the search was performed for testing purposes. All results will be imported into a  
228 collaborative systematic review software.

### 229 3.4.1 PUBMED/MEDLINE

|                                                                                                                                                                                                                                                                                                                                                                                                                                                                                                                                                                                                                                                                                           |
|-------------------------------------------------------------------------------------------------------------------------------------------------------------------------------------------------------------------------------------------------------------------------------------------------------------------------------------------------------------------------------------------------------------------------------------------------------------------------------------------------------------------------------------------------------------------------------------------------------------------------------------------------------------------------------------------|
| Query                                                                                                                                                                                                                                                                                                                                                                                                                                                                                                                                                                                                                                                                                     |
| ("research integrity"[Title/Abstract] OR "publication ethics"[Title/Abstract] OR "scientific integrity"[Title/Abstract] OR "research collaboration"[Title/Abstract]) AND (strategies[Title/Abstract] OR policies[Title/Abstract] OR guidelines[Title/Abstract] OR "qualitative study"[Title/Abstract] OR "quantitative study"[Title/Abstract] OR "international treaties"[Title/Abstract] OR "international declarations and statements"[Title/Abstract] OR statutes[Title/Abstract] OR laws[Title/Abstract] OR regulations[Title/Abstract] OR resolutions[Title/Abstract] OR codes[Title/Abstract] OR rules[Title/Abstract] OR normativity[Title/Abstract] OR statement[Title/Abstract]) |

### 230 3.4.2 WEB OF SCIENCE

|                                                                                                |
|------------------------------------------------------------------------------------------------|
| Query                                                                                          |
| ((((ALL=("research integrity")))) AND ALL=("publication ethics") OR ("scientific misconduct")) |

### 231 3.4.3 JSTOR

|                                              |
|----------------------------------------------|
| Query                                        |
| "research integrity" OR "publication ethics" |

232

### 233 3.4.4 LILACS

|                                                                                                                                                                                                                                                                                                       |
|-------------------------------------------------------------------------------------------------------------------------------------------------------------------------------------------------------------------------------------------------------------------------------------------------------|
| Query                                                                                                                                                                                                                                                                                                 |
| ((("Integridad científica") OR ("Integridad en la investigación") OR ("Mala conducta científica")) AND ((("Prácticas de investigación") OR ("Capacitación en investigación") OR ("Tutoría") OR ("Gestión de datos") OR ("Prácticas de publicación") OR ("Autoría") OR ("Ética en las publicaciones")) |

### 234 3.4.5 SCOPUS

|       |
|-------|
| Query |
|-------|



|                                                                                                                                                                                                                                                                                                                                                                                                               |
|---------------------------------------------------------------------------------------------------------------------------------------------------------------------------------------------------------------------------------------------------------------------------------------------------------------------------------------------------------------------------------------------------------------|
| ( TITLE-ABS-KEY ( "research integrity" OR "publication ethics" OR "scientific integrity" OR "research collaboration" ) AND TITLE-ABS-KEY ( strategies OR policies OR guidelines OR "qualitative study" OR "quantitative study" OR "international treaties" OR "international declarations and statements" OR statutes OR laws OR regulations OR resolutions OR codes OR rules OR normativity OR statement ) ) |
|---------------------------------------------------------------------------------------------------------------------------------------------------------------------------------------------------------------------------------------------------------------------------------------------------------------------------------------------------------------------------------------------------------------|

235 **3.4.6 OECD LIBRARY**

|                                              |
|----------------------------------------------|
| Query                                        |
| "research integrity" OR "publication ethics" |

236 **3.4.7 OTHER INFORMATION SOURCES**

237 For the information sources, we will apply on the search bar the terms related to research integrity  
238 shown in Table 1. We expect to find the best available documents on a case-by-case basis,  
239 complemented with hand searching and scanning.

240 **3.5 SELECTION PROCESS**

241 All retrieved documents—either from databases or through hand searching of websites and  
242 additional grey literature sources—will be compiled in Mendeley, a reference management  
243 software, where they will be tagged by source provenance. From Mendeley, the identified  
244 documents will be imported into Rayyan, collaborative software for systematic reviews, after  
245 removing duplicates.

246 Using Rayyan, four reviewers (CT, LG, FD, JB) working in pairs will independently screen titles and  
247 abstracts.

248 For calibration purposes, each reviewer will screen the same set of ten randomly selected  
249 documents to ensure consistent use of the inclusion and exclusion criteria among the evaluators. We  
250 will repeat this task as many times as necessary until an 80% concordance is reached between the  
251 reviewers.

252 Once calibration has been achieved, the four evaluators will work in pairs and screen the whole  
253 population of identified documents independently and in parallel, thus ensuring an impartial and  
254 blinded screening process. Discrepancies will be resolved by consensus with the participation of two  
255 senior investigators (VCB and JGP).

256 When the title and abstract screening process has been completed, the full text of the eligible  
257 documents will be retrieved. Again, applying the inclusion and exclusion criteria, the four evaluators  
258 working in pairs will select the records for inclusion into this scoping review. As before, discrepancies  
259 will be resolved after discussion with a third, more experienced reviewer or with group discussion.

260 Because the reviewers will become increasingly familiarized with the retrieved documents and more  
261 knowledgeable with the search results, to increase the precision of the results, an interim analysis  
262 will be done when at least 10% of the documents or a threshold of 50 papers—whichever comes  
263 first—have been assessed for inclusion after the full-text evaluation to reassess and adjust the  
264 inclusion and exclusion criteria, if need be.

265 **3.6 DATA CHARTING PROCESS**

266 We will create a form using Google Sheets to extract the relevant information from the information  
267 sources. Each of the four reviewers will be assigned one-fourth of the included documents and will  
268 extract the data items. Another reviewer will cross-check the data extraction to ensure accuracy. The  
269 senior investigators will quality check the charting process regularly to achieve consistency of



270 extraction among the reviewers and with the scoping study objectives, and the charting form will  
271 iteratively be adapted as needed. No authors will be contacted during the data extraction phase.

### 272 3.7 DATA ITEMS

273 We will extract the following information from the full text of the selected non-legal documents: (I)  
274 first author; (II) title; (III) year of publication; (IV) country; (V) article genre (e.g., internal policies,  
275 internal guidelines, original research, statements); (VI) key words; (VIII) other participants including  
276 institution(s) and person(s) involved; (IX) discipline.

277 For legal documents, we will use the following categorization criteria: (I) author (multilateral  
278 organizations, and states and states agencies); (II) title; (III) type of legal document (treaty,  
279 statement, law, policies, guidelines, etc.); (IV) jurisdiction (international, regional, national, and  
280 local); (V) year of publication.

281 Regarding all selected documents, we will extract the following data items for thematic analysis:

- 282 • Objective
- 283 • Main results and conclusions
- 284 • Recommendations

285 Other additional data items might be incorporated during the data extraction process.

### 286 3.8 CRITICAL APPRAISAL

287 As stated previously, no critical appraisal or risk of bias assessment will be done due to the nature of  
288 the topic and the need to map all documents that fulfill the inclusion criteria.

### 289 3.9 SYNTHESIS OF RESULTS

290 Using Google Sheet to collect, summarize, and compare the extracted information for each selected  
291 document, we will do thematic analysis on the included documents based on Braun and Clarke's <sup>17</sup>  
292 thematic analysis methodological approach, which consists of six phases: (i) read and reread the  
293 data to become familiar with it; (ii) generate initial nodes; (iii) search for themes; (iv) review the  
294 themes; (v) define and name the themes; and (vi) elaborate the report.

295 The extracted information will provide insight on objectives, main results, conclusions, and  
296 recommendations, allowing us to understand the impact that population, strategies, findings, and  
297 results have on the design of research integrity normativity, as well as providing an overview of any  
298 stakeholders' role in research integrity development on the legal side. We will also be able to map by  
299 jurisdiction, thus helping us identify each legal system's singularities.

## 300 4 NOTES

---

### 301 **Conflicts of interest statement**

302 The authors declare having no competing interest in the development of this protocol.

### 303 **Ethics**

304 This scoping review goes by the research ethics framework of Colombia and the main international  
305 statements on research ethics (such as Helsinki and Taipei declarations). Ethics committee approval  
306 was granted by Pontificia Universidad Javeriana – Cali (August 26, 2019).

### 307 **Funding**

308 The resulting scoping review is part of a government-funded research project, named “GENERACIÓN  
309 DE RECOMENDACIONES EN INTEGRIDAD CIENTÍFICA – GREICI”, Grant number 852 of 2019  
310 (Colombia). Funder: National Program of Science, Technology and Innovation (“Minciencias” for its  
311 acronym in Spanish).

### 312 **Author contributions**

313 JGP contributed to conceptualization, funding acquisition, investigation, methodology, project  
314 administration, supervision, validation, and review of the original draft. CT, FD, and LG contributed  
315 to the conceptualization, data curation, investigation, methodology, and writing of the original draft.  
316 VCB contributed to conceptualization, investigation, methodology, project administration,  
317 supervision, validation, and review and editing of the original draft.

### 318 **Acknowledgments**

319 Special thanks to Jackeline Bravo Chamorro, Carlos Enrique Trillos, and Diana Bernal for their insights  
320 and feedback on behalf of the GREICI project investigators.

321

## 322 **5 REFERENCES**

---

- 323 (1) Science Europe. Briefing Paper on Research Integrity: What It Means, Why It Is Important and  
324 How We Might Protect It. **2015**. <https://doi.org/10.5281/ZENODO.5060050>.
- 325 (2) Shaw, D.; Satalkar, P. Researchers’ Interpretations of Research Integrity: A Qualitative Study.  
326 *Accountability in Research* **2018**, *25* (2), 79–93.  
327 <https://doi.org/10.1080/08989621.2017.1413940>.
- 328 (3) Davies, S. R.; Lindvig, K. Assembling Research Integrity: Negotiating a Policy Object in  
329 Scientific Governance. *Critical Policy Studies* **2021**, 1–18.  
330 <https://doi.org/10.1080/19460171.2021.1879660>.
- 331 (4) Armond, A. C. V.; Gordijn, B.; Lewis, J.; Hosseini, M.; Bodnár, J. K.; Holm, S.; Kakuk, P. A  
332 Scoping Review of the Literature Featuring Research Ethics and Research Integrity Cases. *BMC*  
333 *Med Ethics* **2021**, *22* (1), 50. <https://doi.org/10.1186/s12910-021-00620-8>.
- 334 (5) Scientific Integrity and Research Misconduct [https://www.usda.gov/our-agency/staff-](https://www.usda.gov/our-agency/staff-offices/office-chief-scientist-ocs/scientific-integrity-and-research-misconduct)  
335 [offices/office-chief-scientist-ocs/scientific-integrity-and-research-misconduct](https://www.usda.gov/our-agency/staff-offices/office-chief-scientist-ocs/scientific-integrity-and-research-misconduct) (accessed 2021  
336 -08 -05).
- 337 (6) *Investigación En Salud: Dimensión Ética*, 1. ed.; Lolas, F., Quezada, Á., Rodríguez, E., Eds.;  
338 CIEB, Universidad de Chile: Chile, 2006.
- 339 (7) 2nd World Conference on Research Integrity. Singapore Statement on Research Integrity. July  
340 1, 2010.
- 341 (8) 3rd World Conference on Research Integrity. Montreal Statement on Research Integrity in  
342 Cross-Boundary Research Collaborations. May 8, 2013.
- 343 (9) Moher, D.; Bouter, L.; Kleinert, S.; Glasziou, P.; Sham, M. H.; Barbour, V.; Coriat, A.-M.;  
344 Foeger, N.; Dirnagl, U. The Hong Kong Principles for Assessing Researchers: Fostering  
345 Research Integrity. *PLoS Biol* **2020**, *18* (7), e3000737.  
346 <https://doi.org/10.1371/journal.pbio.3000737>.
- 347 (10) Universal Declaration on Bioethics and Human Rights: UNESCO. 2005.
- 348 (11) Rodríguez, E.; Lolas, F. The Topic of Research Integrity in Latin America. *Bioethikos* **2011**, *5* (4),  
349 362–368.

- 350 (12) García-Villegas, M.; Franco-Pérez, N.; Cortés-Arbeláez, A. Perspectives on Academic Integrity  
351 in Colombia and Latin America. In *Handbook of Academic Integrity*; Bretag, T., Ed.; Springer  
352 Singapore: Singapore, 2016; pp 161–180. [https://doi.org/10.1007/978-981-287-098-8\\_10](https://doi.org/10.1007/978-981-287-098-8_10).
- 353 (13) Departamento Administrativo de Ciencia, Tecnología e Innovación Colciencias. Resolución  
354 0314 de 2018. 2018.
- 355 (14) Policy of Research Ethics, Bioethics and Scientific Integrity [https://stip.oecd.org/stip/policy-](https://stip.oecd.org/stip/policy-initiatives/2019%2Fdata%2FpolicyInitiatives%2F25447)  
356 [initiatives/2019%2Fdata%2FpolicyInitiatives%2F25447](https://stip.oecd.org/stip/policy-initiatives/2019%2Fdata%2FpolicyInitiatives%2F25447) (accessed 2021 -08 -08).
- 357 (15) Arksey, H.; O'Malley, L. Scoping Studies: Towards a Methodological Framework. *International*  
358 *Journal of Social Research Methodology* **2005**, *8* (1), 19–32.  
359 <https://doi.org/10.1080/1364557032000119616>.
- 360 (16) European Center for Constitutional and Human Rights (ECCHR). Hard Law/Soft Law. *European*  
361 *Center for Constitutional and Human Rights's Glossary*; 2021.
- 362 (17) Braun, V.; Clarke, V. Using Thematic Analysis in Psychology. *Qualitative Research in*  
363 *Psychology* **2006**, *3* (2), 77–101. <https://doi.org/10.1191/1478088706qp063oa>.
- 364
- 365

366 **6 SEARCH STRATEGIES PER DATA SOURCE**

367 Date of search: September 27, 2021.

368 **6.1 SEARCH STRATEGY FOR PUBMED/MEDLINE**

|                  |                  | Query                                                                                                                                                                                                                                                                                                                                                                                                                                                                                                                                                                                                                                                                                            | Hits       |
|------------------|------------------|--------------------------------------------------------------------------------------------------------------------------------------------------------------------------------------------------------------------------------------------------------------------------------------------------------------------------------------------------------------------------------------------------------------------------------------------------------------------------------------------------------------------------------------------------------------------------------------------------------------------------------------------------------------------------------------------------|------------|
| Topic            | 1                | "research integrity"[Title/Abstract] OR "publication ethics"[Title/Abstract] OR "scientific integrity"[Title/Abstract] OR "research collaboration"[Title/Abstract]                                                                                                                                                                                                                                                                                                                                                                                                                                                                                                                               | 3,134      |
| Type of document | 2                | strategies OR policies OR guidelines OR "qualitative study" OR "quantitative study" OR "international treaties" OR "international declarations and statements" OR statutes OR laws OR regulations OR resolutions OR codes OR rules OR normativity OR statement                                                                                                                                                                                                                                                                                                                                                                                                                                   | 1,414,423  |
|                  | <b>#1 AND #2</b> | <b>("research integrity"[Title/Abstract] OR "publication ethics"[Title/Abstract] OR "scientific integrity"[Title/Abstract] OR "research collaboration"[Title/Abstract]) AND (strategies[Title/Abstract] OR policies[Title/Abstract] OR guidelines[Title/Abstract] OR "qualitative study"[Title/Abstract] OR "quantitative study"[Title/Abstract] OR "international treaties"[Title/Abstract] OR "international declarations and statements"[Title/Abstract] OR statutes[Title/Abstract] OR laws[Title/Abstract] OR regulations[Title/Abstract] OR resolutions[Title/Abstract] OR codes[Title/Abstract] OR rules[Title/Abstract] OR normativity[Title/Abstract] OR statement[Title/Abstract])</b> | <b>801</b> |

369

370 **6.2 WEB OF SCIENCE**

|                      |                           | Query                   | Hits       |
|----------------------|---------------------------|-------------------------|------------|
| <b>Topic</b>         | 1                         | "research integrity"    | 1,108      |
| <b>Topic</b>         | 2                         | "publication ethics"    | 556        |
| <b>Interventions</b> | 3                         | "scientific misconduct" | 730        |
|                      | <b>((#1) AND #2) OR 3</b> |                         | <b>777</b> |

371

372 **6.3 JSTOR**

|                  |   | Query                                                                                  | Hits      |
|------------------|---|----------------------------------------------------------------------------------------|-----------|
| Topic            | 1 | "research integrity" OR "publication ethics"                                           | 580       |
| Population       | 2 | researchers OR universities                                                            | 1,246,179 |
| Interventions    | 3 | "supervision and mentoring"                                                            | 38        |
| Type of document | 4 | guidelines OR normativity                                                              | 186,518   |
| #1 AND #2        |   | (( "research integrity" OR "publication ethics" ) AND ( researchers OR universities )) | 318       |
| #1 AND #4        |   | (( "research integrity" OR "publication ethics" ) AND ( guidelines OR normativity ))   | 246       |

373

374 **6.4 LILACS (SEPTEMBER 23<sup>TH</sup> 2021)**

|               |            | Query                                                                                                                                                                                                                                                                                                                   | HITS |
|---------------|------------|-------------------------------------------------------------------------------------------------------------------------------------------------------------------------------------------------------------------------------------------------------------------------------------------------------------------------|------|
| Topic         | 1          | ("Integridad científica") OR ("Integridad en la investigación") OR ("Mala conducta científica")                                                                                                                                                                                                                         | 380  |
| Interventions | 3          | ("Prácticas de investigación") OR ("Capacitación en investigación") OR ("Tutoría") OR ("Gestión de datos") OR ("Prácticas de publicación") OR ("Autoría") OR ("Ética en las publicaciones")                                                                                                                             | 806  |
|               | #1 AND # 3 | (( "Integridad científica" ) OR ( "Integridad en la investigación" ) OR ( "Mala conducta científica" )) AND (( "Prácticas de investigación" ) OR ( "Capacitación en investigación" ) OR ( "Tutoría" ) OR ( "Gestión de datos" ) OR ( "Prácticas de publicación" ) OR ( "Autoría" ) OR ( "Ética en las publicaciones" )) | 556  |

375

376 **6.5 SCOPUS (SEPTEMBER 25 2021)**

|       |   | Query                                                                                              | Hits |
|-------|---|----------------------------------------------------------------------------------------------------|------|
| Topic | 1 | "research integrity" OR "publication ethics" OR "scientific integrity" OR "research collaboration" | 9012 |

|                  |           |                                                                                                                                                                                                                                                                                                                                                                                                               |            |
|------------------|-----------|---------------------------------------------------------------------------------------------------------------------------------------------------------------------------------------------------------------------------------------------------------------------------------------------------------------------------------------------------------------------------------------------------------------|------------|
| Type of document | 2         | strategies OR policies OR guidelines OR "qualitative study" OR "quantitative study" OR "international treaties" OR "international declarations and statements" OR statutes OR laws OR regulations OR resolutions OR codes OR rules OR normativity OR statement                                                                                                                                                | 11,376,587 |
|                  | #1 AND #2 | ( TITLE-ABS-KEY ( "research integrity" OR "publication ethics" OR "scientific integrity" OR "research collaboration" ) AND TITLE-ABS-KEY ( strategies OR policies OR guidelines OR "qualitative study" OR "quantitative study" OR "international treaties" OR "international declarations and statements" OR statutes OR laws OR regulations OR resolutions OR codes OR rules OR normativity OR statement ) ) | 3,554      |

377

## 378 6.6 OECD ILIBRARY

|                  |   | Query                                                                                  | Hits   |
|------------------|---|----------------------------------------------------------------------------------------|--------|
| Topic            | 1 | "research integrity" OR "publication ethics"                                           | 30     |
| Population       | 2 | researchers OR universities                                                            | 60,544 |
| Interventions    | 3 | "supervision and mentoring"                                                            | 0      |
| Type of document | 4 | guidelines OR normativity                                                              | 28,569 |
| #1 AND #2        |   | (( "research integrity" OR "publication ethics" ) AND ( researchers OR universities )) | 30     |
| #1 AND #4        |   | (( "research integrity" OR "publication ethics" ) AND ( guidelines OR normativity ))   | 27     |

379
